# Supplementary material for: Urinary Exosomes Contain MicroRNAs Capable of Paracrine Modulation of Tubular Transporters in Kidney
Source: PubMed Central journal article supplement (PMC5240140; doi:10.1038/srep40601), 2017-01-17

**Urinary Exosomes Contain MicroRNAs Capable of Paracrine Modulation of  
Tubular Transporters in Kidney**

**SUPPLEMENTARY DATA**

Tannia Gracia, Xiaonan Wang, Ya Su, Elizabeth E. Norgett, Timothy L. Williams, Pablo Moreno, Gos  
Micklem and Fiona E. Karet Frankl

### Supplementary Figure 1. Characterization of exosomes isolated from urine

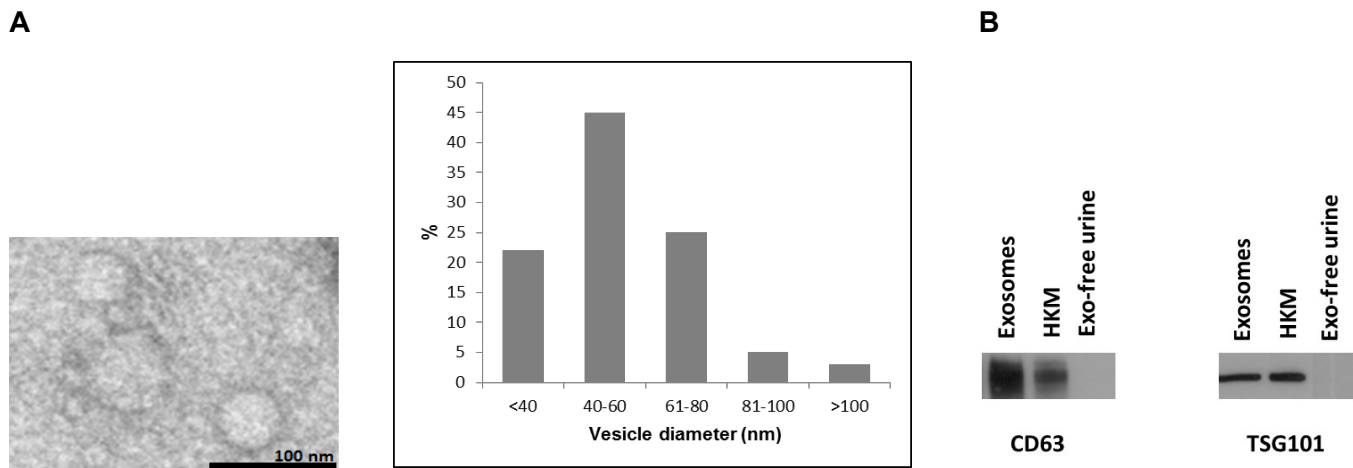

**(A)** Electron microscopy shows the integrity of urinary exosomes: rounded vesicles with a size distribution of  $59.0 \pm 1.93$  nm. **(B)** The presence of exosomal markers CD63 and TSG101 was confirmed by western blot. Both markers were absent in exosome-free urine. HKM = Human Kidney Membrane.

**Supplementary Figure 2. Confirmation of expression of selected predicted miRNA targets in human proximal tubular and human collecting duct cells**

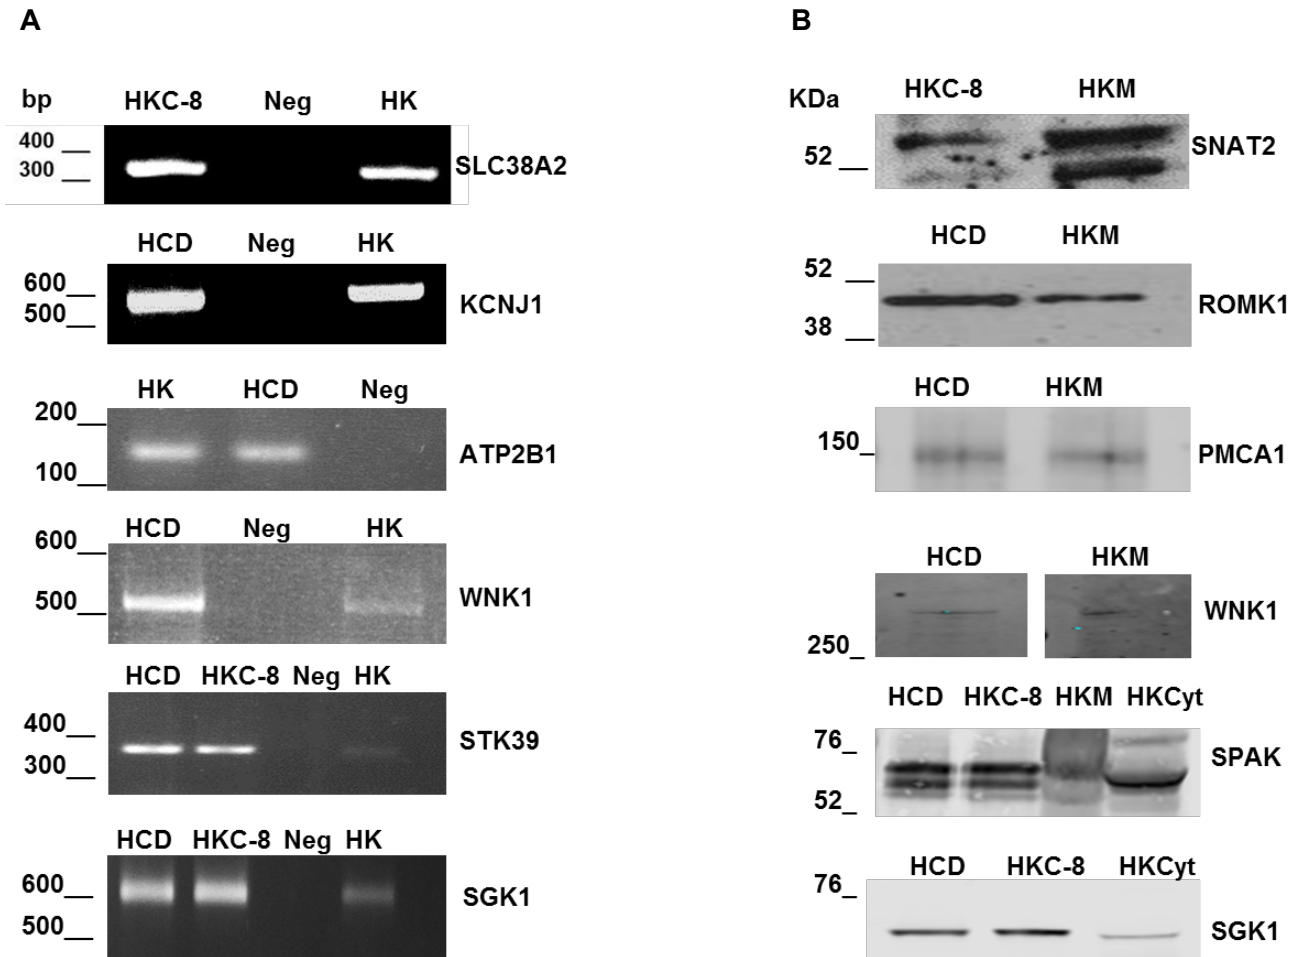

Panels in column A represent RT-PCR products corresponding to mRNA expression of miRNA predicted targets in HKC-8 (human proximal tubular) and HCD (human collecting duct) cells. Negative control template was water and positive control template was human kidney cDNA. Panels in column B are western blots of HKC-8 and HCD cell lysates using antibodies against the selected targets. Positive controls were human kidney membrane (HKM) or cytosol (HKCyt). bp= base pair, KDa=kilodalton

**Supplementary Figure 3. Buffer alone or UMOD do not affect expression levels in HCD and HKC8 cells respectively**

**A**

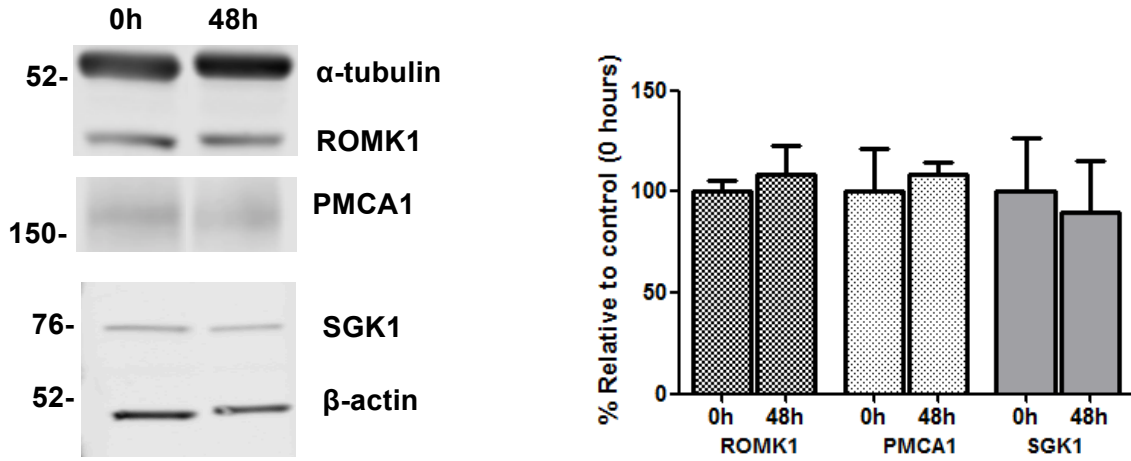

**B**

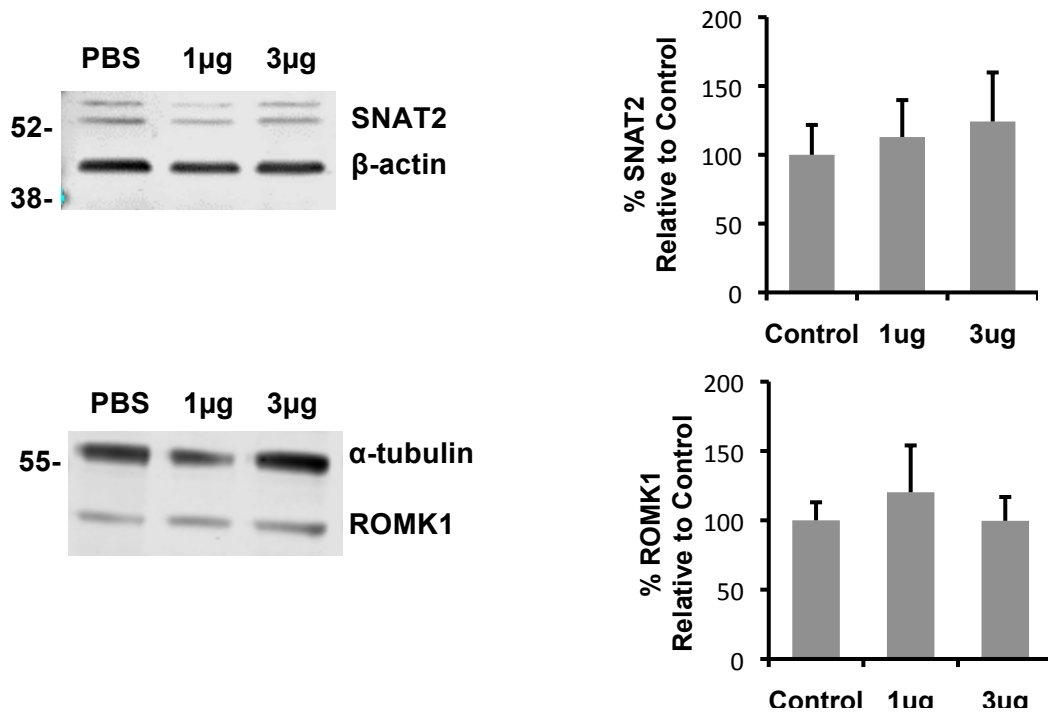

(A) Buffer alone does not alter protein levels in this cell culture system: representative western blots and densitometry of ROMK1, PMCA1 and SGK1, in HCD cells exposed to buffer (PBS) for 48 hours are shown. PMCA1 was detected on the same blot as ROMK1, with α-tubulin as the loading control. (B) Representative western blots and densitometry of SNAT2 in HKC-8 cells and ROMK1 in HCD cells exposed to PBS (Control), 1µg or 3µg of uromodulin for 48h. No significant differences were observed. All densitometry analyses are of 3 repeats.

**Supplementary Table 1. miRNA amount extracted from urinary exosomes of individual filtered urine samples**

| <b>Sample No.</b> | <b>Volume (mL)</b> | <b>miRNA ng/100mL Urine</b> | <b>miRNA (% of small RNAs)</b> |
|-------------------|--------------------|-----------------------------|--------------------------------|
| HV003F            | 380                | 4.6                         | 65                             |
| HV049F            | 250                | 15.8                        | 52                             |
| HV055F            | 450                | 3.1                         | 44                             |
| HV060F            | 220                | 9.1                         | 49                             |
| HV061F            | 250                | 13.5                        | 87                             |
| HV056M            | 300                | 6.4                         | 41                             |
| HV057M            | 380                | 5.6                         | 63                             |
| HV059M            | 380                | 13.0                        | 49                             |
| HV064M            | 300                | 1.3                         | 30                             |
| HV075M            | 300                | 1.0                         | 24                             |
| <b>Mean</b>       | <b>321</b>         | <b>7.3</b>                  | <b>50.40</b>                   |
| <b>SE</b>         | <b>23.26</b>       | <b>1.67</b>                 | <b>5.73</b>                    |

F = Female, M = Male

**Supplementary Tables 2-4: provided separately**

**Supplementary Table 5. miRNA amount extracted from exosomes isolated from filtered and non-filtered samples**

| <b>Sample No.</b> | <b>Volume mL</b> | <b>miRNA (ng/100mL Urine)</b> |                     |
|-------------------|------------------|-------------------------------|---------------------|
|                   |                  | <b>Filtered</b>               | <b>Not Filtered</b> |
| HV003F            | 200              | 3.8                           | 16.0                |
| HV049F            | 125              | 3.0                           | 10.0                |
| HV065F            | 225              | 0.5                           | 3.8                 |
| HV056M            | 200              | 3.3                           | 42.4                |
| HV064M            | 150              | 1.3                           | 5.5                 |
| HV057M            | 225              | 1.1                           | 2.7                 |

F = Female, M = Male

**Supplementary Table 6. Primer sequences used for PCR and qRT-PCR Amplification of cDNAs of selected targets**

| Gene           | Forward primer sequence [5'3'] | Reverse primer sequence [5'3'] | Amplicon Length [bp] |
|----------------|--------------------------------|--------------------------------|----------------------|
| <i>KCNJ1</i>   | ATTGTGATCCCACAAGACATGC         | CAACTCCTCATTGCTGTCTTCG         | 587                  |
| <i>STK39</i>   | CAGTGAGTGCCAGCACCATC           | CAGCTGACACTCAACTGAGC           | 391                  |
| <i>SGK1</i>    | TATGACAGGACTGTGGACTG           | AAGGCGGCACTCTAACGCTC           | 635                  |
| <i>WNK1</i>    | ATGCCATGAATCTCAGGCAG           | AGACTCTCCATTCTGAGGGCTC         | 542                  |
| <i>ATP2B1</i>  | CCTGAGGAGGAATTAGCAGAGGA        | CTACGAAATGCATTCACTACTCGAAT     | 125                  |
| <i>SLC38A2</i> | GTCATAGTCTCATTACAGTGTC         | CTGGCATCAGATGGACTGAG           | 328                  |
| <b>qRT-PCR</b> |                                |                                |                      |
| <i>SLC38A2</i> | GTCATAGTCTCATTACAGTGTC         | CACCAACTTGATATAGAAGGC          | NA                   |
| <i>KCNJ1</i>   | CACCAACTTGATATAGAAGGC          | CTTCATCCTGGCTCTAACAT           | NA                   |
| <i>B2M</i>     | GAGGCTATCCAGCGTACTCCA          | CGGCAGGCATACTCATCTTTT          | NA                   |
| <i>GAPDH</i>   | GGAGCGAGATCCCTCCAAAT           | GGCTGTTGTCATACTTCTCATGG        | NA                   |

**Supplementary Table 7. TaqMan® MicroRNA Assays used to compare miRNA abundance by qRT-PCR**

| Assay ID | miRNA          | Sequence                                   |
|----------|----------------|--------------------------------------------|
| 000388   | hsa-miR-10b    | UACCCUGUAGAACCGAAUUUGU                     |
| 000387   | hsa-miR-10a    | UACCCUGUAGAUCCGAAUUUGUG                    |
| 000417   | hsa-miR-30a-5p | UGUAAACAUCCUCGACUGGAAG                     |
| 000470   | hsa-miR-148a   | UCAGUGCACUACAGAACUUUGU                     |
| 000474   | hsa-miR-152    | UCAGUGCAUGACAGAACUUGGG                     |
| 001093   | RNU6B          | CGCAAGGAUGACACGCAAUUCGUGAAGCGUUCCAUUAUUUUU |

**Supplementary Table 8. Antibodies used for immunoblotting**

| Antibody Target/Name        | Source/Catalogue number | Type               | Dilution |
|-----------------------------|-------------------------|--------------------|----------|
| <b>Primary Antibodies</b>   |                         |                    |          |
| CD63                        | Abcam/ab8219            | Mouse/mAb          | 1:100    |
| TSG101                      | Abcam/ab83              | Mouse/mAb          | 1:100    |
| ROMK1                       | SIGMA/SAB2501215        | Goat/pAb           | 1:100    |
| SPAK                        | Abcam/ab128894          | Rabbit/mAb         | 1:200    |
| SGK1                        | Abcam/ab43606           | Rabbit/pAb         | 1:100    |
| WNK1                        | Abcam/ab53151           | Rabbit/pAb         | 1:100    |
| PMCA1                       | Abcam/ab190355          | Rabbit/mAb         | 1:100    |
| SNAT2                       | SIGMA/AV33058           | Rabbit/pAb         | 1:100    |
| Uromodulin                  | CEDERLANE/CL1032A       | Mouse/mAb          | 1:200    |
| ε-Actin                     | Abcam/ab6276            | Mouse/mAb          | 1:2000   |
| α-Tubulin                   | Abcam/ab7291            | Mouse/mAb          | 1:2000   |
| <b>Secondary Antibodies</b> |                         |                    |          |
| IRDye® 680 RD               | 925-68073               | Donkey anti-Rabbit | 1:1000   |
| IRDye® 800 CW               | 926-32214               | Donkey anti-Goat   | 1:1000   |
| IRDye® 800 CW               | 926-32210               | Goat anti-Mouse    | 1:2000   |

mAb = monoclonal antibody; pAb = polyclonal antibody

## **Additional material**

### **Video 1**

Live cell microscopy of Hoescht-333-labelled human collecting duct (HCD) cells exposed to PKH67-labelled exosomes (green) over a 2h period, showing adherence and progressive internalisation.

### **Video 2**

Control live cell microscopy of similar HCD cells exposed to PKH67 alone over a 2h period.

Additional Material for Figures 4/5

ORIGINAL BLOTS FOR FIGURE 4

Blot for Figure 4A

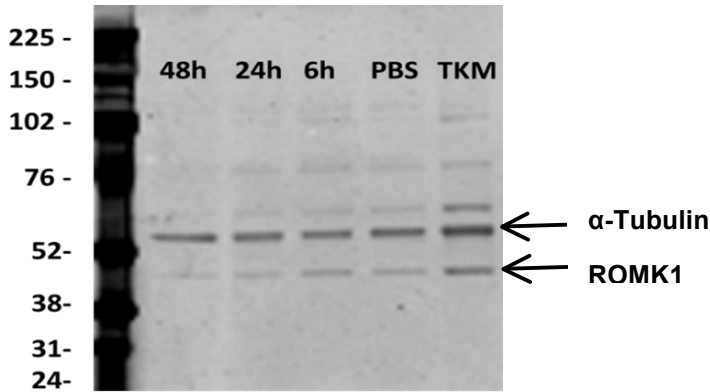

Blot for Figure 4B

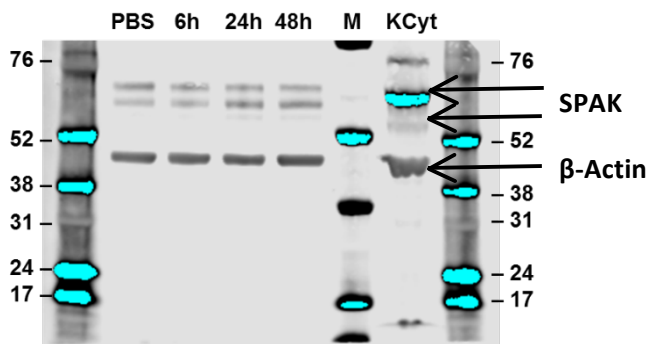

**$\beta$ -Actin** : 45KDa  
 **$\alpha$ -Tubulin** : 55 KDa  
**ROMK1**: 45KDa  
**SPAK**: 60KDa, 65KDa  
**SGK1**: 59 KDa  
**WNK1**: 250KDa, 225KDa  
**TKM**: Total Kidney Membrane  
**KCyt**: Kidney Cytosol  
**M**: Marker (Rainbow, Amersham)

Blot for Figure 4C

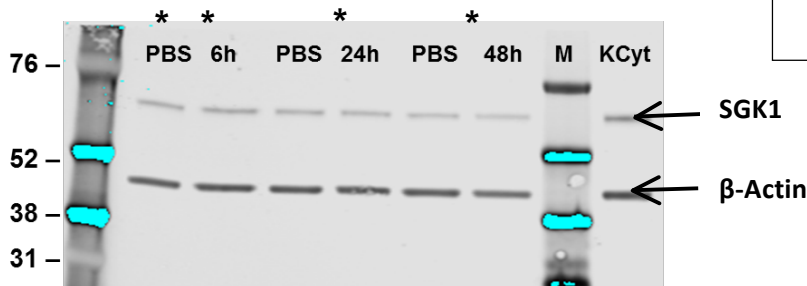

Blot for Figure 4D

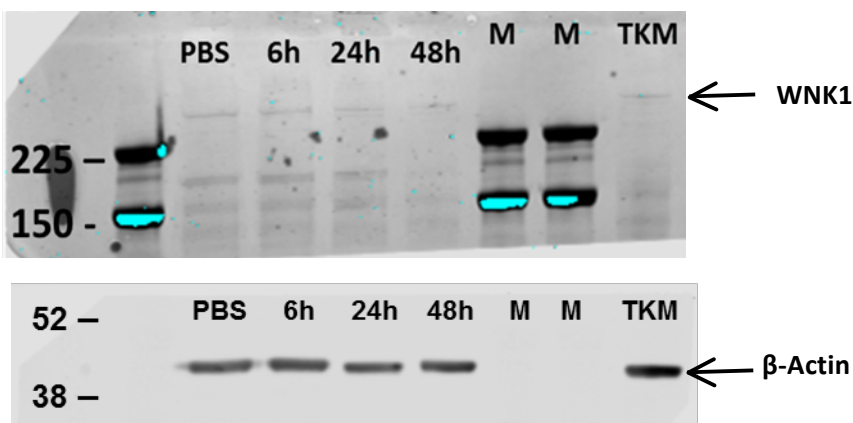



Blot for Figure 4E

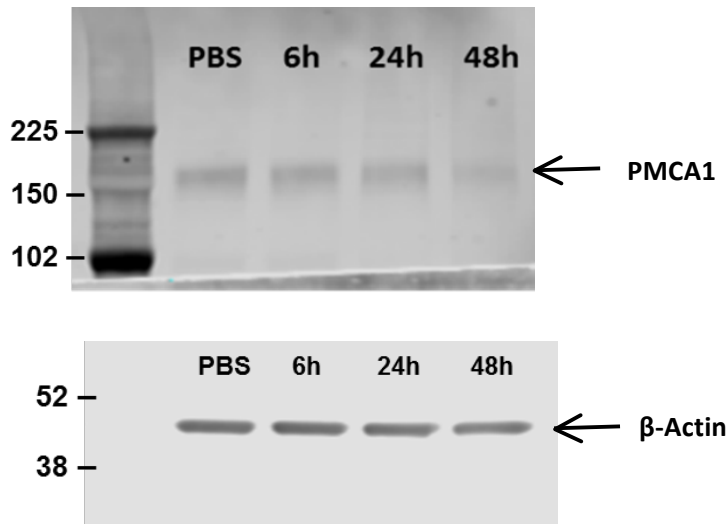

ORIGINAL BLOTS FOR FIGURE 5

Blot for Figure 5A

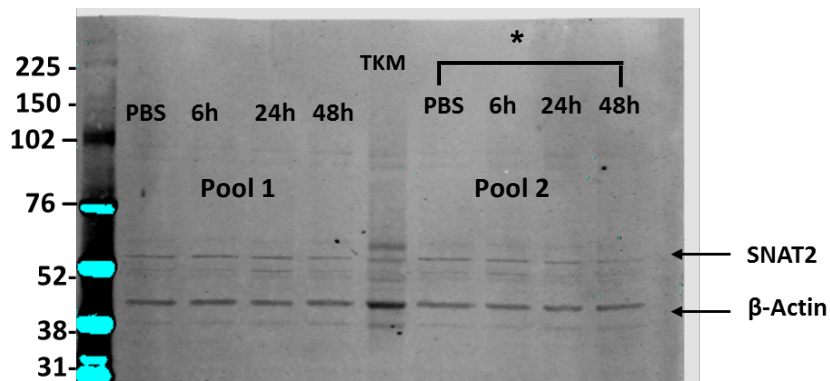

**PMCA1:** 140-150 KDa  
 **$\beta$ -Actin :** 45KDa  
 **$\alpha$ -Tubulin :** 55 KDa  
**SNAT2:** 55KDa  
**SGK1:** 59 KDa  
**M:** Marker (Rainbow, Amersham)  
**\*** : Portion of the blot used for Figure 5A

Blot for Figure 5B

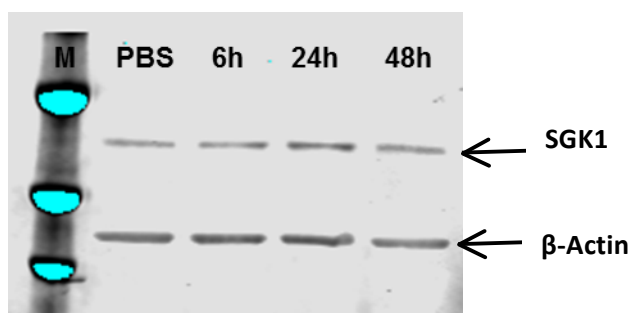

Supplement: srep40601-s1.pdf [file srep40601-s1.pdf]
